# Supplementary material
Source: HighWire-hosted journal article supplement (https://www.annfammed.org/highwire/filestream/7866/field_highwire_adjunct_files/1/Daaleman_Suppl_Table.pdf)
Supplement: Daaleman_Suppl_Table.pdf [file Daaleman_Suppl_Table.pdf]

Online Supplementary Material

Daaleman TP, Frey BB. The spirituality index of well-being: a new instrument for health-related quality-of-life research. *Ann Fam Med.* 2004;2:499-503.

<http://www.annfammed.org/cgi/content/full/2/5/499/DC1>

**Supplemental Table. Demographic and Health Service Characteristics of Study Sample (N = 550)**

| Characteristics                              | Respondents<br>No. (%) | Nonrespondents<br>No. (%) |
|----------------------------------------------|------------------------|---------------------------|
| <b>Sex</b>                                   |                        |                           |
| Female                                       | 344 (67.6)             | 25 (62.5)                 |
| Male                                         | 165 (32.4)             | 15 (37.5)                 |
| <b>Race-ethnicity</b>                        |                        |                           |
| White                                        | 401 (78.8)             | 30 (75.0)                 |
| African American                             | 94 (18.5)              | 6 (15.0)                  |
| Hispanic, Latino                             | 9 (1.8)                | 2 (5.0)                   |
| Asian American                               | 4 (0.8)                | 1 (2.5)                   |
| Other                                        | 1 (0.2)                | ---                       |
| <b>Marital status</b>                        |                        |                           |
| Married                                      | 257 (50.8)             |                           |
| Single or never married                      | 114 (22.5)             |                           |
| Divorced                                     | 63 (12.5)              |                           |
| Widowed                                      | 49 (9.7)               |                           |
| Separated                                    | 13 (2.6)               |                           |
| Life partner                                 | 10 (2.0)               |                           |
| <b>Education level</b>                       |                        |                           |
| Less than high school                        | 63 (12.4)              |                           |
| High school graduate                         | 136 (26.8)             |                           |
| Vocational, trade school                     | 50 (9.9)               |                           |
| Some college                                 | 158 (31.2)             |                           |
| College graduate                             | 68 (13.4)              |                           |
| Graduate/professional school                 | 32 (6.3)               |                           |
| <b>Length of time with current physician</b> |                        |                           |
| <1 year                                      | 131 (25.8)             |                           |
| 1-3 years                                    | 139 (27.4)             |                           |
| 4-7 years                                    | 112 (22.0)             |                           |
| 7-10 years                                   | 71 (14.0)              |                           |
| 10-15 years                                  | 44 (8.7)               |                           |
| ≥16 years                                    | 11 (2.2)               |                           |
| <b>Health insurance</b>                      |                        |                           |
| Private health insurance                     | 319 (62.9)             |                           |
| Private and Medicare                         | 64 (12.6)              |                           |
| Medicaid                                     | 42 (8.3)               |                           |
| Medicare and Medicaid                        | 35 (6.9)               |                           |
| Medicare                                     | 26 (5.1)               |                           |
| No insurance                                 | 19 (3.7)               |                           |
| Other                                        | 2 (0.8)                |                           |
